# Supplementary material
Source: MDPI journal article supplement (https://www.mdpi.com/2227-9040/10/7/286)
Supplement: s1 [file s1 › chemosensors-1765470-supplementary.pdf]

# Self-Powered Photoelectrochemical Assay for Hg<sup>2+</sup> Detection Based on g-C<sub>3</sub>N<sub>4</sub>-CdS-CuO Composites and Redox Cycle Signal Amplification Strategy

Yonghuan Su <sup>1</sup>, Lixia Su <sup>1</sup>, Bingqian Liu <sup>1,\*</sup>, Youxiu Lin <sup>2</sup> and Dianping Tang <sup>3,\*</sup>

<sup>1</sup> Guizhou Engineering Laboratory for Synthetic Drugs (Ministry of Education of Guizhou Province), College of Pharmacy, Guizhou University, Guiyang 550025, China; gs.yhsu20@gzu.edu.cn (Y.S.); gs.lxsu20@gzu.edu.cn (L.S.)

<sup>2</sup> Key Laboratory of Modern Analytical Science and Separation Technology of Fujian Province, College of Chemistry, Chemical Engineering and Environment, Minnan Normal University, Zhangzhou 363000, China; lyx1817@mnnu.edu.cn

<sup>3</sup> Key Laboratory of Analytical Science for Food Safety and Biology (MOE & Fujian Province), Department of Chemistry, Fuzhou University, Fuzhou 350108, China

\* Correspondence: nqliu@gzu.edu.cn (B.L.); dianping.tang@fzu.edu.cn (D.T.); Tel.: +86-591-22866125 (D.T.)

## 1. Synthesis of the g-C<sub>3</sub>N<sub>4</sub> and CdS

The water-dispersing g-C<sub>3</sub>N<sub>4</sub> was prepared according to the literature [1] as follows: 5 g of melamine in a crucible was annealed at 550 °C for 4 h. Then, 1 g of the as-prepared bulk-C<sub>3</sub>N<sub>4</sub> powder was refluxed in 100 mL of 5 M HNO<sub>3</sub> at 125 °C for 12 h and kept overnight. The formed light yellow precipitates were isolated by centrifugation and washed with water several times. Afterward, the final product was dried at 60 °C for further use.

Preparation of CdS QDs [2], firstly, 0.1623 g CdCl<sub>2</sub>·2.5H<sub>2</sub>O was mixed with 30 mL of ultrapure water and heated to 70 °C. Next, a freshly prepared Na<sub>2</sub>S (30 mL, 0.0627 g/mL) solution was slowly injected into the mixture solution and kept at 70 °C for 3 h with continuous reflux. The color of the reaction solution immediately turned orange-yellow. The collected precipitation was centrifuged and washed twice with absolute ethanol and ultrapure water, respectively. Finally, the CdS QDs were re-dispersed in ultrapure water and stored at 4 °C in the dark for further use.

## 2. Setting parameters of the EIS and Cyclic Voltammetry(CV)

The electrochemical workstation was used to record the EIS, and the parameter was set for Init E (V) = 0.315, High Frequency (Hz) = 1 MHz, Low Frequency (Hz) = 0.1, Amplitude (V) = 0.005, Quiet Time (sec) = 2, Cycles (.1-1Hz) = 1.

CV uses an electrochemical workstation, Set the parameters to Init E (V) = -0.2, High E (V) = 1, Low E (V) = -0.2, Init P/N = P, Scan Rate (V/s) = 0.02, Segment = 2, Sample Interval (V) = 0.001, Quiet Time (SEC) = 2, Sensitivity (A/V) = 0.001.

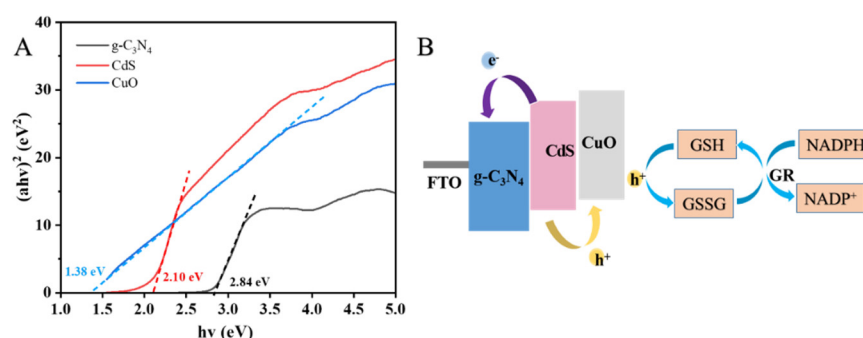

**Figure S1.** The band gaps of g-C<sub>3</sub>N<sub>4</sub>, CdS and CuO were measured by the UV-vis diffuse reflection spectra (DRS) (A), the picture shows the direction of electrons in the photoelectric sensor under light conditions (B).

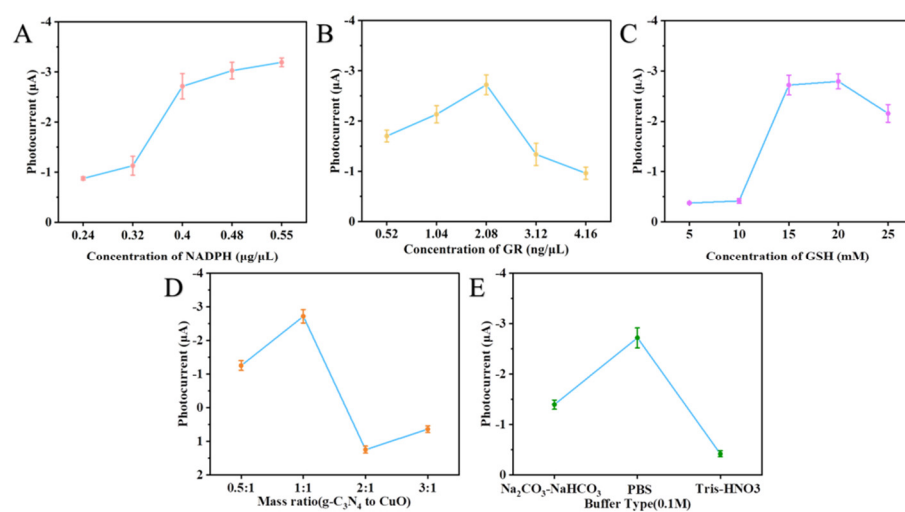

**Figure S2.** (A) Concentration of NADPH; (B) Concentration of GR; (C) Concentration of GSH; (D) Mass ratio of g-C<sub>3</sub>N<sub>4</sub> to CuO; (E) Different types of buffer solutions (0.1M).

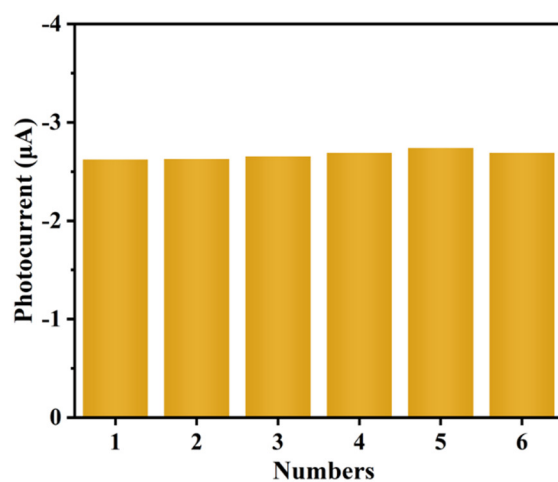

**Figure S3.** Reproducibility of g-C<sub>3</sub>N<sub>4</sub>-CdS-CuO at 0.5 nM Hg<sup>2+</sup>.

**Table S1.** Comparison of other analysis strategies for Hg<sup>2+</sup> detection.

| Methods              | Materials                                | Linear Ranges  | LODs     | Refs      |
|----------------------|------------------------------------------|----------------|----------|-----------|
| Fluorescence         | CDs-AgNPs                                | 100–160 μM     | 22.2 nM  | [3]       |
| Colorimetric         | Hg-MB                                    | 0–400 μM       | 19.5 nM  | [4]       |
| Electrochemical      | Cu-MOF                                   | 0.1–50 nM      | 0.063 nM | [5]       |
| Electrochemical      | S-rGO                                    | 0.125–6 μM     | 1.6 nM   | [6]       |
| Electrochemical      | N,S-doped C@Pd                           | 0.00054–5.0 μM | 0.18 nM  | [7]       |
| Photoelectrochemical | g-C <sub>3</sub> N <sub>4</sub> @CdS     | 20–550 nM      | 12 nM    | [8]       |
| Photoelectrochemical | Bi <sub>2</sub> MoO <sub>6</sub> /CuS-6% | 0.5–230 nM     | 0.23 nM  | [9]       |
| Photoelectrochemical | g-C <sub>3</sub> N <sub>4</sub> -CdS-CuO | 0.005–100 nM   | 0.84 pM  | this work |

## References

1. Dong, Y.X.; Cao, J.T.; Wang, B.; Ma, S.H.; Liu, Y.M. Spatial-Resolved Photoelectrochemical Biosensing Array Based on a CdS@g-C<sub>3</sub>N<sub>4</sub> Heterojunction: A Universal Immunosensing Platform for Accurate Detection. *ACS Appl. Mater. Interfaces* **2018**, *10*, 3723–3731.
2. Zhang, Y.H.; Li, M.J.; Wang, H.J.; Yuan, R.; Wei, S.P. Supersensitive Photoelectrochemical Aptasensor Based on Br,N-Codoped TiO<sub>2</sub> Sensitized by Quantum Dots. *Anal. Chem.* **2019**, *91*, 10864–10869.
3. Zhang, K.Y.; Sang, Y.X.; Gao, Y.D.; Sun, Q.X.; Li, W.N. A fluorescence turn-on CDs-AgNPs composites for highly sensitive and selective detection of Hg<sup>2+</sup>. *Spectrochim. Acta Part A* **2022**, *264*, 120281.
4. Li, D.W.; Ling, S.; Cheng, X.R.; Yang, Z.Q.; Lv, B. Development of a DNAzyme-based colorimetric biosensor assay for dual detection of Cd<sup>2+</sup> and Hg<sup>2+</sup>. *Anal. Bioanal. Chem.* **2021**, *413*, 7081–7091.
5. Singh, S.; Numan, A.; Zhan, Y.Q.; Singh, V.; Hung, T.V.; Nam, N.D. A novel highly efficient and ultrasensitive electrochemical detection of toxic mercury (II) ions in canned tuna fish and tap water based on a copper metal-organic framework. *J. Hazard. Mater.* **2020**, *399*, 123042.
6. Ran, Q.X.; Sheng, F.F.; Chang, G.R.; Zhong, M.; Xu, S.X. Sulfur-doped reduced graphene oxide@chitosan composite for the selective and sensitive electrochemical detection of Hg<sup>2+</sup> in fish muscle. *Microchem. J.* **2022**, *175*, 107138.
7. Wang, L.Y.; Yang, Y.X.; Liang, H.H.; Wu, N.; Peng, X.; Wang, L.; Song, Y.H. A novel N,S-rich COF and its derived hollow N,S-doped carbon@Pd nanorods for electrochemical detection of Hg<sup>2+</sup> and paracetamol. *J. Hazard. Mater.* **2021**, *409*, 124528.
8. Li, Z.P.; Dong, W.X.; Du, X.Y.; Wen, G.G.; Fan, X.J. A novel photoelectrochemical sensor based on g-C<sub>3</sub>N<sub>4</sub>@CdS QDs for sensitive detection of Hg<sup>2+</sup>. *Microchem. J.* **2020**, *152*, 104259.
9. Zhang, X.Y.; Li, M.Y.; He, L.M.; Tian, D.D.; Zhang, L.J.; Zhang, J.H.; Liu, M. Highly sensitive and selective photoelectrochemical sensor for mercury(II) detection based on efficient Bi<sub>2</sub>MoO<sub>6</sub> photoanode decorated with CuS. *J. Alloys Compd.* **2020**, *864*, 157905.
